# Supplementary material
Source: PubMed Central journal article supplement (PMC2715481)
Supplement: 0905188106_0905188106SI.pdf [file 0905188106_0905188106SI.pdf]

# Supporting Information

Drake et al. 10.1073/pnas.0905188106

## SI Text

**Mice.** Wild-type C57BL/6 and congenic CD45.1, Thy1.1, GFP, and IL-7R $\alpha^{-/-}$  mice were purchased from Jackson Laboratories and Charles River. Mice were housed in specific pathogen-free conditions. GFP $^{+/+}$  mice were crossed with ST8Sia IV $^{-/-}$  mice, and F1 progeny were bred and selected for ST8Sia IV $^{-/-}$ ; GFP $^{+}$  offspring. All experiments were approved by UC Berkeley's Animal Care and Use Committee. The generation of ST8Sia IV $^{-/-}$  mice has been described (Eckhardt et al., 2000). After initial production, the ST8Sia IV $^{-/-}$  mice were backcrossed to C57BL/6 for at least 6 generations before use in these studies.

**Antibodies.** Fluorescein-conjugated anti-CD3 $\epsilon$  (145–2C11), anti-CD4 (GK1.5), anti-CD11b (M1/70), anti-CD25 (PC61.5), anti-TCR $\beta$  (H57–597), anti-Gr-1 (RB6–8C5), anti-TER119; phycoerythrin-Cy5-conjugated Sca-1 (D7), isotype control rat IgG2a; and allophycocyanin-conjugated secondary anti-mouse IgG were purchased from eBioscience.

Fluorescein-conjugated anti-CD8a (53–6.7), anti-TCR $\gamma\delta$  (GL3), anti-NK1.1 (PK136), anti-B220 (RA3–6B2), and isotype controls mouse IgG2a (G155–178), rat IgG1 (R3–34), rat IgG2a (R35–95), rat IgG2b (A95–1); phycoerythrin-conjugated anti-CD8a (53–6.7), anti-CD25 (PC61), anti-CD90.2/Thy1.2 (53–2.1), anti-CD117 (2B8), and isotype controls rat IgG1 (R3–34), rat IgG2a (R35–95); phycoerythrin-Cy5-conjugated anti-CD3 (17A2), anti-CD44 (IM7); and peridinin chlorophyll-a protein

(PerCP)-conjugated anti-CD90.1/Thy1.1 (OX-7) were purchased from BD Biosciences.

**Flow Cytometry/Thymocyte Characterization.** Cells were isolated, counted by hemocytometer, and immediately incubated for 10 min with Mouse BD Fc Block (anti-Fc $\gamma$ III/II R; BD Biosciences), followed by the addition of antibodies for staining. After 20 min, cells were washed twice in PBS (Invitrogen) and analyzed on a FACSCalibur (BD Biosciences) instrument with CellQuest (BD Biosciences) software. Thymocyte phenotyping experiments were repeated 9 times ( $n = 16$  and  $18$  for ST8Sia IV $^{-/-}$  and wild type, respectively).

**Detection of Early T-lineage Progenitors.** Leukocytes were isolated from bone marrow, blood, and thymus, counted by hemocytometer, and monitored by flow cytometry to detect lineage markers (including TER119, CD3, CD4, CD8, B220, NK1.1, Gr-1, TCR $\beta$ , TCR $\gamma\delta$ , and CD11b). All lineage-positive cells were excluded from further analysis, and the remaining lineage-negative (Lin $^{-}$ ) population was assessed for expression of cKit and Sca-1. LSKs were defined as Lin $^{-}$ , cKit $^{+}$ , Sca-1 $^{+}$  that fell within the lymphocyte region of a forward- and side-scatter plot. LSKs (100–800 cells) were counted/bone marrow sample (experiment repeated 6 times,  $n = 12$ , ST8Sia IV $^{-/-}$ ;  $n = 15$ , wild type); 3–100 LSKs were counted/thymocyte sample (experiment repeated 5 times,  $n = 7$ , ST8Sia IV $^{-/-}$ ;  $n = 8$ , wild type); and 15–40 LSKs were counted/blood sample (experiment repeated twice,  $n = 3$ , ST8Sia IV $^{-/-}$ ;  $n = 4$ , wild type).

**Table S1. Noncompetitive reconstitution of irradiated mice by wild-type and ST8Sia IV<sup>-/-</sup> bone marrow**

| Donor                                     | Recipient                | Total # Thymocytes<br>(millions) | % Donor-Derived<br>Thymocytes | # Donor-Derived<br>Thymocytes (millions) |
|-------------------------------------------|--------------------------|----------------------------------|-------------------------------|------------------------------------------|
| Wild type GFP <sup>+</sup>                | Wild type                | 136 ± 36                         | 91 ± 2                        | 123 ± 31                                 |
| Wild type GFP <sup>+</sup>                | ST8Sia IV <sup>-/-</sup> | 139 ± 31                         | 93 ± 1                        | 130 ± 30                                 |
| ST8Sia IV <sup>-/-</sup> GFP <sup>+</sup> | Wild type                | 138 ± 27                         | 91 ± 0.6                      | 127 ± 24                                 |
| ST8Sia IV <sup>-/-</sup> GFP <sup>+</sup> | ST8Sia IV <sup>-/-</sup> | 144 ± 27                         | 89 ± 1                        | 129 ± 24                                 |

Recipient mice were injected intravenously with  $1.2 \times 10^6$  donor bone marrow cells. After 4 weeks, thymocytes were analyzed for donor origin (identified by GFP expression).  $n = 4$  recipient mice/group.
